# Supplementary material for: No preclinical rationale for IGF1R directed therapy in chondrosarcoma of bone
Source: Springer Nature journal article supplement (doi:10.1186/s12885-016-2522-8), 2016-07-14

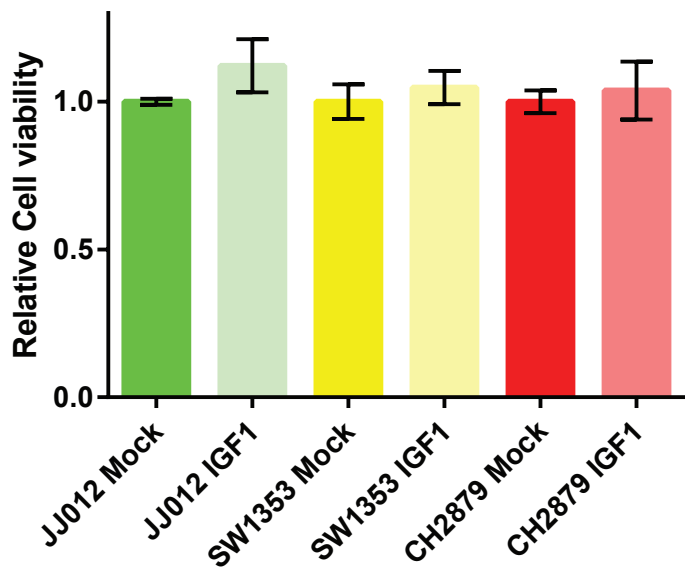

Supplement: MOESM3 [file 10495640]
